# Supplementary material for: Dual Targeting of Y-Box Binding Protein-1 and Akt Inhibits Proliferation and Enhances the Chemosensitivity of Colorectal Cancer Cells
Source: MDPI journal article supplement (doi:10.3390/cancers11040562), 2019-04-19

# Supplementary Materials: Dual Targeting of Y-Box Binding Protein-1 and Akt Inhibits Proliferation and Enhances the Chemosensitivity of Colorectal Cancer Cells

Eva Maier, Felix Attenberger, Aadhya Tiwari, Konstanze Lettau, Simone Rebholz, Birgit Fehrenbacher, Martin Schaller, Cihan Gani and Mahmoud Toulany

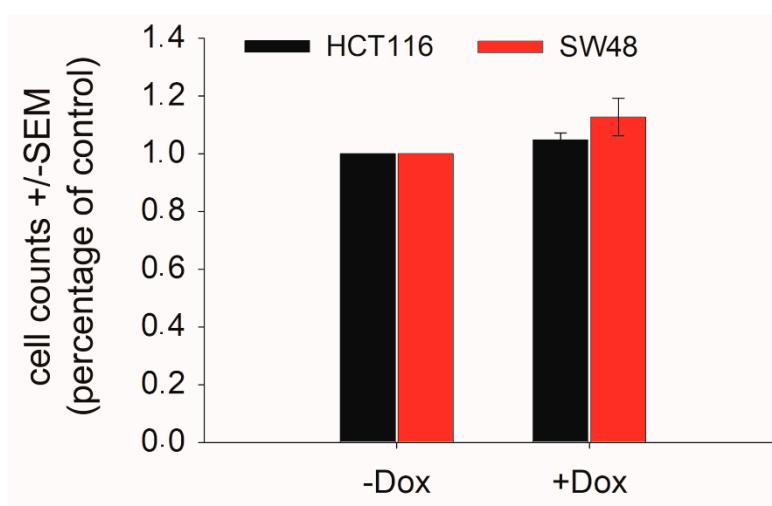

**Figure S1.** Doxycycline does not block proliferation of indicated CRC cell lines. KRAS(G13D)-mutated HCT116 cells and KRAS wild-type CaCo2 cells were seeded in 60 mm culture dishes and 24 h later were treated with doxycycline (2 µg/mL). Cells were trypsinized and counted using a hemocytometer 72 h after treatment. Data presents mean cell counts +/- SEM from 5 parallel experiments.

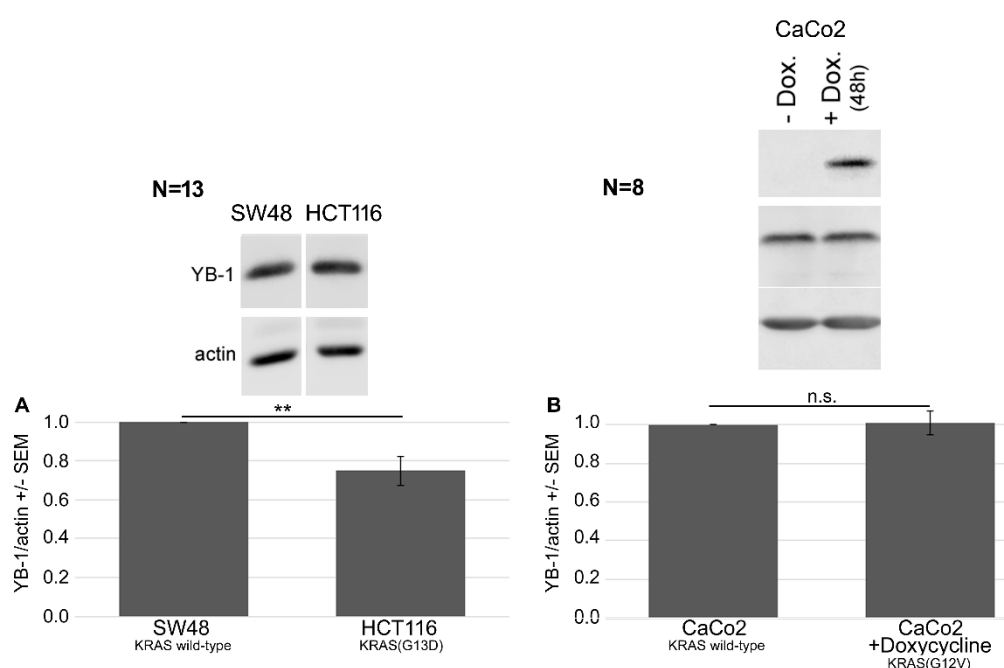

**Figure S2.** KRAS mutation does not stimulate YB-1 expression in CRC cells. Protein samples were isolated from untreated KRAS wild-type SW48, KRAS(G13D)-mutated HCT116 and KRAS wild-type CaCo2 cells as well as from CaCo2 cells 48 after treatment with doxycycline (2 µg/mL) and subjected

to Western blotting. Data presents ratio of YB-1 to actin normalized to 1 in KRAS wild-type SW48 cells (A) and CaCo2 cells (B). Asterisks indicate significant difference in expression of YB-1 between SW48 and HCT116 cells between the indicated groups (\*\*  $p \leq 0.01$ ). n.s.: not significant.

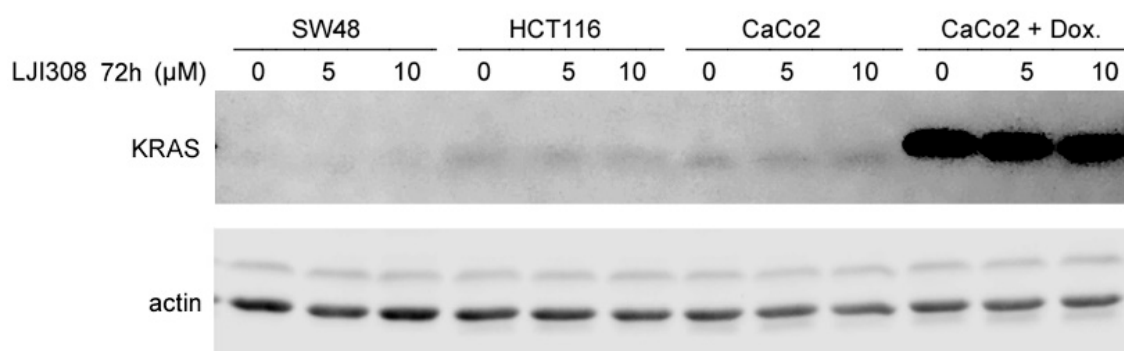

**Figure S3.** Level of endogenous KRAS in CRC cells. KRAS wild-type SW48 and CaCo2 cells as well as KRAS(G13D)-mutated HCT116 and doxycycline-treated CaCo2 cells were treated with an RSK inhibitor (5 μM and 10 μM) for 72 hours. KRAS was detected by Western blotting. Actin was detected as a loading control.

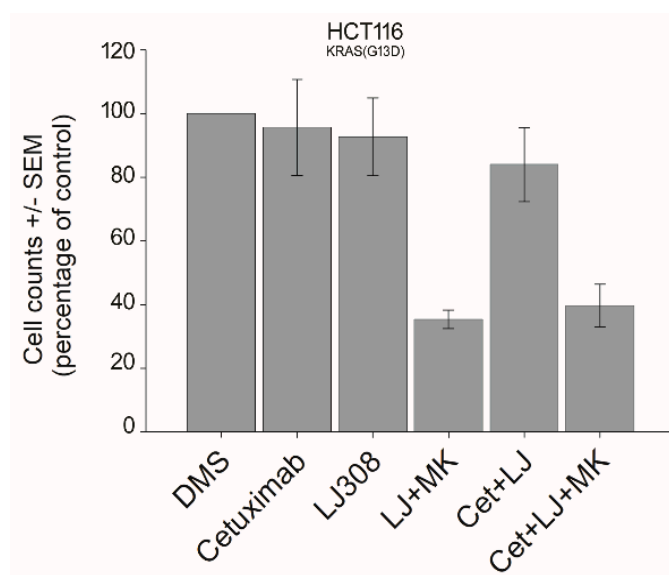

**Figure S4.** Combination of the RSK (LJ308, 20 μM) and Akt (MK2206, 5 μM) inhibitors with cetuximab (100 ng/mL) does not improve the effect of cetuximab as analyzed by the proliferation assay 72 h after treatment.

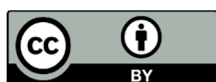

Supplement: s2 [file s2]
